# Supplementary material for: Tungsten Bronze-Type Ceramics for Temperature-Stable Energy Storage Properties: A Feasibility Study
Source: MDPI journal article supplement (doi:10.3390/cryst13071073), 2023-07-08
Supplement: s1 [file s1]

Archive with 1 entries (1 files):
- crystals-2475988-supplementary.pdf
